# Supplementary material for: The Health Promoting Bioactivities of Lactuca sativa can be Enhanced by Genetic Modulation of Plant Secondary Metabolites
Source: PubMed Central journal article supplement (PMC6572300; doi:10.3390/metabo9050097), 2019-05-12
Supplement: metabolites-09-00097-s001.pdf [file metabolites-09-00097-s001.pdf]

Article

## SUPPLEMENTARY DATA: “The health promoting bioactivities of *Lactuca sativa* can be enhanced by genetic modulation of plant secondary metabolites.”

Hamad Ismail<sup>1</sup>, Anna L Gillespie<sup>2</sup>, Danielle Calderwood<sup>2</sup>, Haroon Iqbal<sup>2</sup>, Colene Gallagher<sup>2</sup>, Olivier P Chevallier<sup>2,3</sup>, Christopher T Elliott<sup>2,3</sup>, Xiaobei Pan<sup>2</sup>, Bushra Mirza<sup>1</sup>, Brian D Green<sup>2,3\*</sup>

<sup>1</sup> Department of Biochemistry, Quaid-I-Azam University, 45320, Islamabad, Pakistan.

<sup>2</sup> Institute for Global Food Security, School of Biological Sciences, Queen’s University Belfast, Chlorine Gardens, Belfast, BT9 5DJ, UK;

<sup>3</sup> Core Technology Unit for Mass Spectrometry, Faculty of Medicine, Health and Life Sciences, Queen’s University Belfast, UK

\* Correspondence: b.green@qub.ac.uk; Tel.: +44-2890-97-6541.

**Supplementary Data contained in this document:** Table S1: Changes in the levels of some unidentified metabolites in *Lactuca sativa*, Table S2: LC-MS characteristics of sesquiterpene lactone metabolites putatively identified in *Lactuca sativa*, Table S3: LC-MS characteristics of non-phenolic metabolites putatively identified in *Lactuca sativa*, Table S4: LC-MS characteristics of phenolic metabolites putatively identified in *Lactuca sativa*.

**Table S1** Changes in the levels of some unidentified metabolites in *Lactuca sativa*

| No. | Retention time | Detected mass         | Rol ABC (RA) |                |         | Rol C (RC) |                |         | Commercial (COM) |                |         |
|-----|----------------|-----------------------|--------------|----------------|---------|------------|----------------|---------|------------------|----------------|---------|
|     |                |                       | ↑/↓          | % Change ± SEM | P value | ↑/↓        | % Change ± SEM | P value | ↑/↓              | % Change ± SEM | P value |
| 1   | 7.18           | 462.0791 <sup>v</sup> | ↓            | 94 ± 4.9       | 0.001** | ↓          | 96 ± 3.0       | 0.001** | ↑                | 33,528 ± 138.9 | 0.001** |
| 2   | 7.41           | 464.0949 <sup>v</sup> | ↓            | 92 ± 1.6       | 0.001** | ↓          | 85 ± 5.0       | 0.001** | ↑                | 5,067 ± 73.3   | 0.001** |
| 3   | 7.30           | 448.0999 <sup>v</sup> | ↓            | 91 ± 3.4       | 0.001** | ↓          | 55 ± 21.6      | 0.073   | ↑                | 3,246 ± 5.5    | 0.001** |
| 4   | 9.18           | 286.0464 <sup>v</sup> | ↓            | 54 ± 25.3      | 0.099   | ↓          | 89 ± 2.7       | 0.001** | ↑                | 5,251 ± 226.7  | 0.001** |
| 5   | 10.12          | 375.2016              | ↓            | 80 ± 3.6       | 0.001** | ↓          | 52 ± 3.2       | 0.004** | ↑                | 6,594 ± 260.0  | 0.001** |
| 6   | 9.42           | 423.1648              | ↑            | 29 ± 36.8      | 0.161   | ↑          | 57 ± 49.3      | 0.114   | ↑                | 35,741 ± 162.5 | 0.001** |
| 7   | 13.89          | 577.2664              | ↑            | 594 ± 220.4    | 0.026*  | ↓          | 56 ± 29.7      | 0.119   | ↑                | 1,515 ± 47.8   | 0.001** |
| 8   | 1.65           | 585.2865              | ↑            | 1,193 ± 223.1  | 0.003** | ↑          | 2,710 ± 471.1  | 0.002** | ↑                | 6,537 ± 124.1  | 0.001** |

|    |       |            |   |               |         |   |               |         |   |               |         |
|----|-------|------------|---|---------------|---------|---|---------------|---------|---|---------------|---------|
| 9  | 8.57  | 415.1031   | ↑ | 916 ± 423.5   | 0.047*  | ↑ | 592 ± 196.4   | 0.018*  | ↑ | 5,704 ± 146.6 | 0.001** |
| 10 | 8.74  | 208.0723 † | ↑ | 315 ± 150.8   | 0.047*  | ↑ | 257 ± 104.6   | 0.026*  | ↑ | 7,473 ± 217.5 | 0.001** |
| 11 | 12.88 | 311.2212   | ↑ | 408 ± 186.7   | 0.044*  | ↑ | 358 ± 70.5    | 0.003** | ↑ | 5,137 ± 2.9   | 0.001** |
| 12 | 3.10  | 327.1304 † | ↑ | 87 ± 21.3     | 0.005** | ↑ | 327 ± 92.8    | 0.011*  | ↑ | 2,759 ± 37.2  | 0.001** |
| 13 | 6.79  | 307.1384   | ↓ | 34 ± 18.7     | 0.188   | ↓ | 22 ± 6.3      | 0.217   | ↑ | 1,106 ± 11.7  | 0.001** |
| 14 | 5.43  | 254.0787 † | ↑ | 71 ± 26.0     | 0.018*  | ↑ | 265 ± 81.9    | 0.014*  | ↑ | 2,124 ± 75.5  | 0.001** |
| 15 | 13.36 | 313.2367   | ↑ | 1,149 ± 577.8 | 0.057   | ↑ | 729 ± 102.2   | 0.001** | ↑ | 1,349 ± 47.6  | 0.001** |
| 16 | 3.48  | 294.0940 † | ↑ | 1,431 ± 178.9 | 0.034*  | ↑ | 1,635 ± 140.0 | 0.005** | ↓ | 99 ± 1.8      | 0.001** |
| 17 | 13.74 | 675.3009   | ↑ | 1,771 ± 622.5 | 0.023*  | ↓ | 11 ± 29.7     | 0.463   | ↓ | 60 ± 4.0      | 0.001** |
| 18 | 13.94 | 675.3000   | ↑ | 1,841 ± 328.2 | 0.030*  | ↓ | 51 ± 16.5     | 0.052   | ↓ | 86 ± 1.7      | 0.001** |
| 19 | 14.73 | 555.2831   | ↑ | 1,182 ± 598.6 | 0.058   | ↓ | 64 ± 30.6     | 0.094   | ↑ | 499 ± 30.8    | 0.001** |
| 20 | 13.43 | 649.2848   | ↑ | 2,030 ± 736.9 | 0.025*  | ↓ | 35 ± 44.6     | 0.330   | ↓ | 94 ± 2.3      | 0.001** |
| 21 | 14.77 | 571.2875   | ↑ | 1,462 ± 497.0 | 0.021*  | ↓ | 53 ± 41.6     | 0.201   | ↑ | 63 ± 9.6      | 0.001** |
| 22 | 14.68 | 705.3471   | ↑ | 1,731 ± 451.5 | 0.009** | ↓ | 31 ± 31.6     | 0.119   | ↓ | 72 ± 6.5      | 0.001** |
| 23 | 13.82 | 663.3005   | ↑ | 1,287 ± 397.7 | 0.015*  | ↓ | 31 ± 34.6     | 0.321   | ↓ | 90 ± 1.9      | 0.001** |
| 24 | 14.44 | 691.3315   | ↑ | 1,227 ± 68.4  | 0.013*  | ↓ | 66 ± 8.2      | 0.004*  | ↓ | 95 ± 1.9      | 0.001** |
| 25 | 14.34 | 722.3013   | ↑ | 1,653 ± 265.0 | 0.033*  | ↓ | 13 ± 22.4     | 0.488   | ↓ | 42 ± 4.7      | 0.009** |
| 26 | 14.93 | 438.2720 † | ↑ | 2,995 ± 932.1 | 0.016*  | ↑ | 123 ± 142.5   | 0.196   | ↑ | 384 ± 11.3    | 0.001** |
| 27 | 14.22 | 293.2101   | ↑ | 1,433 ± 442.7 | 0.015*  | ↑ | 394 ± 149.8   | 0.027*  | ↑ | 63 ± 17.2     | 0.001** |
| 28 | 14.44 | 1017.5232  | ↑ | 1,722 ± 121.0 | 0.002** | ↑ | 32 ± 33.9     | 0.128   | ↓ | 73 ± 4.4      | 0.001** |
| 29 | 2.30  | 370.1456 † | ↑ | 1,318 ± 127.8 | 0.030*  | ↑ | 1,405 ± 58.9  | 0.001** | ↓ | 67 ± 1.8      | 0.001** |
| 30 | 2.51  | 415.1441   | ↑ | 1,475 ± 149.2 | 0.001** | ↑ | 1,185 ± 354.5 | 0.014*  | ↑ | 15 ± 3.2      | 0.009** |
| 31 | 14.12 | 293.2101   | ↑ | 1,979 ± 338.0 | 0.021*  | ↑ | 1,134 ± 20.4  | 0.001** | ↑ | 115 ± 12.2    | 0.001** |
| 32 | 13.68 | 293.2104   | ↑ | 1,221 ± 127.3 | 0.070   | ↓ | 28 ± 7.6      | 0.116   | ↑ | 748 ± 56.2    | 0.001** |
| 33 | 14.65 | 675.3381   | ↑ | 1,399 ± 81.9  | 0.004*  | ↓ | 17 ± 5.6      | 0.365   | ↓ | 43 ± 2.2      | 0.008** |

|    |       |                       |   |               |        |   |               |         |   |               |         |
|----|-------|-----------------------|---|---------------|--------|---|---------------|---------|---|---------------|---------|
| 34 | 14.22 | 689.3231              | ↑ | 1,345 ± 105.5 | 0.014* | ↓ | 4 ± 4.1       | 0.163   | ↓ | 32 ± 1.8      | 0.031*  |
| 35 | 14.14 | 295.2255              | ↑ | 1,250 ± 96.7  | 0.026* | ↑ | 5 ± 13.6      | 0.151   | ↑ | 237 ± 24.4    | 0.001** |
| 36 | 0.96  | 290.1034              | ↑ | 96 ± 108.2    | 0.184  | ↑ | 3,271 ± 110.5 | 0.175   | ↑ | 3,531 ± 444.2 | 0.075   |
| 37 | 0.96  | 581.2152              | ↑ | 195 ± 183.9   | 0.160  | ↑ | 5,350 ± 541.5 | 0.174   | ↑ | 5,179 ± 585.9 | 0.061   |
| 38 | 4.70  | 706.2374              | ↑ | 154 ± 67.8    | 0.035* | ↑ | 1,205 ± 24.5  | 0.001*  | ↓ | 99 ± 1.8      | 0.001** |
| 39 | 9.45  | 412.2070 <sup>y</sup> | ↓ | 19 ± 4.3      | 0.283  | ↑ | 1,134 ± 22.0  | 0.054   | ↓ | 94 ± 1.9      | 0.001** |
| 40 | 6.65  | 424.1742 <sup>y</sup> | ↓ | 10 ± 28.7     | 0.458  | ↑ | 1,135 ± 29.3  | 0.092   | ↓ | 92 ± 1.8      | 0.001** |
| 41 | 9.14  | 455.1916              | ↓ | 9 ± 14.7      | 0.392  | ↑ | 1,149 ± 16.5  | 0.013*  | ↓ | 92 ± 1.9      | 0.001** |
| 42 | 2.89  | 370.1457 <sup>y</sup> | ↑ | 372 ± 137.2   | 0.024* | ↑ | 1,451 ± 63.9  | 0.001** | ↓ | 57 ± 1.8      | 0.002** |
| 43 | 6.11  | 369.1180              | ↑ | 34 ± 29.1     | 0.093  | ↑ | 1,133 ± 27.3  | 0.003** | ↓ | 70 ± 2.8      | 0.001** |
| 44 | 6.46  | 471.1871              | ↓ | 20 ± 2.5      | 0.213  | ↑ | 1,120 ± 6.8   | 0.014*  | ↓ | 90 ± 1.8      | 0.001** |
| 45 | 1.58  | 638.1980              | ↓ | 154 ± 31.1    | 0.003* | ↑ | 1,467 ± 109.7 | 0.006** | ↑ | 1,012 ± 5.0   | 0.001** |
| 46 | 10.91 | 327.2167              | ↑ | 10 ± 9.5      | 0.396  | ↑ | 1,216 ± 101.2 | 0.043*  | ↑ | 570 ± 6.8     | 0.001** |
| 47 | 11.39 | 330.2394 <sup>y</sup> | ↓ | 17 ± 20.3     | 0.116  | ↑ | 1,272 ± 129.6 | 0.046*  | ↑ | 117 ± 2.1     | 0.001** |
| 48 | 1.58  | 292.1391              | ↑ | 57 ± 11.9     | 0.004* | ↑ | 1,204 ± 46.9  | 0.005** | ↑ | 474 ± 7.2     | 0.001** |
| 49 | 11.63 | 329.2319              | ↑ | 66 ± 12.5     | 0.003* | ↑ | 1,299 ± 93.2  | 0.014*  | ↑ | 64 ± 1.9      | 0.001** |
| 50 | 6.83  | 369.1180              | ↑ | 104 ± 33.0    | 0.013* | ↑ | 1,223 ± 32.3  | 0.001** | ↓ | 6 ± 2.1       | 0.170   |

Table shows the percentage change in levels of unidentified metabolites compared with untransformed (unT) *Lactuca sativa* plants. Values are % mean (± SEM) and P values indicate differences with unT plants (\* p < 0.05, \*\* p < 0.01). Detected masses were represented as m/z [M-H]<sup>-</sup> and “n” represents the neutral mass

**Table S2** LC-MS characteristics of sesquiterpene lactone metabolites putatively identified in *Lactuca sativa*

| No. | RT (min) | Observed m/z ([M-H] <sup>-</sup> ) | Calculated m/z ([M-H] <sup>-</sup> ) | Error (ppm) | Major Fragments m/z ([M-H] <sup>-</sup> )                  | Putative compound                                                                      | Empirical formula                                                | Empirical weight | Class              |
|-----|----------|------------------------------------|--------------------------------------|-------------|------------------------------------------------------------|----------------------------------------------------------------------------------------|------------------------------------------------------------------|------------------|--------------------|
| 1   | 2.97     | 409.1297                           | 409.1287                             | 2.4         | 257.0753, 213.0968, 151.0391, 107.0781                     | Lactucopicrin                                                                          | C <sub>23</sub> H <sub>22</sub> O <sub>7</sub>                   | 410.4166*        | Lactone            |
| 2   | 13.97    | 481.1233                           | 481.1135                             | 20.4        | 257.0885, 213.0759, 151.0316, 107.044                      | Lactucopicrin-15-oxalate                                                               | C <sub>25</sub> H <sub>22</sub> O <sub>10</sub>                  | 482.1140         | Lactone            |
| 3   | 5.62     | 411.1485                           | 411.1444                             | 10.0        | 277.1069, 259.0780, 215.1066, 151.0391, 107.0399           | 11β,13-dihydrolactucopicrin                                                            | C <sub>23</sub> H <sub>24</sub> O <sub>7</sub>                   | 412.1449         | Lactone            |
| 4   | 6.95     | 275.0934                           | 275.0919                             | 5.5         | 213.0849, 185.0811                                         | Lactucin                                                                               | C <sub>15</sub> H <sub>16</sub> O <sub>5</sub>                   | 276.2845*        | Lactone            |
| 5   | 4.66     | 471.1096                           | 471.1073                             | 4.9         | 454.0898, 427.1523, 391.2080, 356.0896, 339.0364, 131.0306 | Lactucin-sulfate                                                                       | C <sub>19</sub> H <sub>24</sub> N <sub>2</sub> O <sub>10</sub> S | 472.1079         | Lactone derivative |
| 6   | 6.46     | 339.0517                           | 339.0538                             | -6.2        | 96.9466                                                    | 15-deoxylactucin-8-sulfate                                                             | C <sub>15</sub> H <sub>16</sub> O <sub>7</sub> S                 | 340.0544         | Lactone            |
| 7   | 4.79     | 485.1276                           | 485.123                              | 9.5         | 405.1581, 427.1523, 391.2080, 356.0974, 339.0592, 145.0742 | 15-deoxylactucin-8-sulfate-Gln                                                         | C <sub>20</sub> H <sub>26</sub> N <sub>2</sub> O <sub>10</sub> S | 486.1235         | Lactone derivative |
| 8   | 4.94     | 454.1203                           | 454.1172                             | 6.8         | 339.0554, 114.0487                                         | 15-deoxylactucin-8-sulfate-Pro                                                         | C <sub>20</sub> H <sub>25</sub> N <sub>2</sub> O <sub>9</sub> S  | 454.1177         | Lactone derivative |
| 9   | 4.07     | 456.1378                           | 456.1328                             | 11.0        | 356.0703, 339.0479, 116.0885                               | 15-deoxylactucin-8-sulfate-Val                                                         | C <sub>20</sub> H <sub>27</sub> N <sub>2</sub> O <sub>9</sub> S  | 457.1334         | Lactone derivative |
| 10  | 6.57     | 341.0674                           | 341.0695                             | -6.2        | 96.9415                                                    | 8-deacetylmatricarin-8-sulfate                                                         | C <sub>15</sub> H <sub>18</sub> O <sub>7</sub> S                 | 342.07           | Lactone            |
| 11  | 4.4      | 519.1203                           | 519.1172                             | 6.0         | 501.0999, 475.1301                                         | Cichorioside B-sulfate                                                                 | C <sub>21</sub> H <sub>28</sub> O <sub>13</sub> S                | 520.1178         | Lactone derivative |
| 12  | 1.73     | 561.2349                           | 561.2336                             | 2.3         | 427.1185, 409.1131, 151.0492                               | 1β-(4-hydroxyphenylacetyl) - 15-O-β-D-glucopyranosyl-5α, 6βH-eudesma-3-en-12, 6α-olide | C <sub>29</sub> H <sub>38</sub> O <sub>11</sub>                  | 562.2341         | Lactone            |

\*Compared by database entries.

**Table S3** LC-MS characteristics of non-phenolic metabolites putatively identified in *Lactuca sativa*

| No. | RT (min) | Observed m/z ([M-H] <sup>-</sup> ) | Calculated m/z ([M-H] <sup>-</sup> ) | Error (ppm) | Major Fragments m/z ([M-H] <sup>-</sup> )        | Putative compound                 | Empirical formula                                              | Empirical weight | Class      |
|-----|----------|------------------------------------|--------------------------------------|-------------|--------------------------------------------------|-----------------------------------|----------------------------------------------------------------|------------------|------------|
| 1   | 1.65     | 130.0834                           | 130.0868                             | -26.1       | 112.0724, 86.0967                                | Leucine/Isoleucine                | C <sub>6</sub> H <sub>13</sub> NO <sub>2</sub>                 | 131.1729*        | Amino Acid |
| 2   | 4.29     | 259.1307                           | 259.1294                             | 5.0         | 215.1426, 171.1512, 130.0881                     | Glycine-Leucine                   | C <sub>11</sub> H <sub>19</sub> N <sub>2</sub> O <sub>5</sub>  | 259.279*         | Amino Acid |
| 3   | 4.82     | 421.1828                           | 421.1822                             | 1.4         | 331.1492, 241.1147, 218.0829, 130.0834, 128.0347 | Glycine-Leucine/Isoleucine-hexose | C <sub>17</sub> H <sub>29</sub> N <sub>2</sub> O <sub>10</sub> | 422.1828         | Amino Acid |
| 4   | 3.93     | 203.0817                           | 203.0821                             | -2.0        | 159.0829, 142.0648, 116.0466, 74.0298            | Tryptophan                        | C <sub>11</sub> H <sub>12</sub> N <sub>2</sub> O <sub>2</sub>  | 204.2252*        | Amino Acid |
| 5   | 7.54     | 365.1309                           | 365.1349                             | -11.0       | 203.0876, 159.0854                               | Tryptophan-hexose                 | C <sub>17</sub> H <sub>22</sub> N <sub>2</sub> O <sub>7</sub>  | 366.1354         | Amino Acid |
| 6   | 1.14     | 180.064                            | 180.0661                             | -11.7       | 163.0366, 119.0537, 93.0424                      | Tyrosine                          | C <sub>9</sub> H <sub>11</sub> NO <sub>3</sub>                 | 181.1885*        | Amino Acid |
| 7   | 5.26     | 342.1191                           | 342.1189                             | 0.6         | 180.0668                                         | Tyrosine-hexose                   | C <sub>15</sub> H <sub>21</sub> NO <sub>8</sub>                | 343.1194         | Amino Acid |
| 8   | 3.11     | 164.068                            | 164.0712                             | -19.5       | 147.0433, 103.0478, 72.0113                      | Phenylalanine                     | C <sub>9</sub> H <sub>11</sub> NO <sub>2</sub>                 | 165.1891*        | Amino Acid |

|    |      |          |          |       |                                        |                                      |                                                               |           |                        |
|----|------|----------|----------|-------|----------------------------------------|--------------------------------------|---------------------------------------------------------------|-----------|------------------------|
| 9  | 2.85 | 326.1211 | 326.124  | -8.9  | 236.0969, 206.0798, 164.0706, 147.0409 | Phenylalanine-hexose                 | C <sub>15</sub> H <sub>21</sub> NO <sub>7</sub>               | 237.1245  | Amino Acid             |
| 10 | 5.7  | 133.011  | 133.0137 | -20.3 | 115.0016, 71.0125                      | Malic acid                           | C <sub>4</sub> H <sub>6</sub> O <sub>5</sub>                  | 134.0874* | Fatty Acyls            |
| 11 | 1.1  | 147.026  | 147.0293 | -22.4 | 103.027                                | Citramalic acid                      | C <sub>5</sub> H <sub>8</sub> O <sub>5</sub>                  | 148.114*  | Fatty Acyls            |
| 12 | 0.89 | 128.0324 | 128.0348 | -18.7 | 82.0264                                | Pyroglutamic acid                    | C <sub>5</sub> H <sub>7</sub> NO <sub>3</sub>                 | 129.114*  | Carboxylic acids       |
| 13 | 5.73 | 241.1179 | 241.1188 | -3.7  | 197.1286, 130.0834                     | Pyroglutamic acid-Leucine/Isoleucine | C <sub>11</sub> H <sub>18</sub> N <sub>2</sub> O <sub>4</sub> | 242.1194  | Amino Acid             |
| 14 | 4.63 | 175.059  | 175.0606 | -9.1  | 157.0498, 115.0477, 113.0540, 85.0591  | Isopropylmalic acid                  | C <sub>7</sub> H <sub>12</sub> O <sub>5</sub>                 | 176.1672* | Fatty Acyls            |
| 15 | 8.11 | 187.0944 | 187.097  | -13.9 | 169.0822, 143.1036, 125.0918           | Azelaic acid                         | C <sub>9</sub> H <sub>16</sub> O <sub>4</sub>                 | 188.2209* | Fatty Acyls            |
| 16 | 5.57 | 191.0545 | 191.0556 | -5.8  | 87.0471                                | Quinic acid                          | C <sub>7</sub> H <sub>12</sub> O <sub>6</sub>                 | 192.1666* | Alcohols & polyols     |
| 17 | 0.78 | 191.0177 | 191.0192 | -7.9  | 111.0088, 87.0032                      | Citric Acid                          | C <sub>6</sub> H <sub>8</sub> O <sub>7</sub>                  | 192.1235* | Carboxylic acids       |
| 18 | 7.15 | 186.1101 | 186.113  | -15.6 | 142.1234, 125.0963                     | Amino oxononanoic acid               | C <sub>9</sub> H <sub>17</sub> N <sub>3</sub>                 | 187.1136  | Organic acid           |
| 19 | 2.33 | 218.1011 | 218.1028 | -7.8  | 148.0794, 88.0450, 71.0505             | Pantothenic acid (vitamin B5)        | C <sub>9</sub> H <sub>17</sub> NO <sub>5</sub>                | 219.235*  | Carboxylic acids       |
| 20 | 1.09 | 243.0607 | 243.0617 | -4.1  | 200.0535, 152.0319, 140.0325, 110.0211 | Uridine                              | C <sub>9</sub> H <sub>12</sub> N <sub>2</sub> O <sub>6</sub>  | 244.2014* | Pyrimidine nucleosides |

|    |      |          |          |      |                              |                                                      |                                                               |           |                         |
|----|------|----------|----------|------|------------------------------|------------------------------------------------------|---------------------------------------------------------------|-----------|-------------------------|
| 21 | 0.73 | 266.0865 | 266.0889 | -9.0 | 134.0470, 107.0251           | Adenosine                                            | C <sub>10</sub> H <sub>13</sub> N <sub>5</sub> O <sub>4</sub> | 267.2413* | Purine nucleosides      |
| 22 | 1.9  | 282.0835 | 282.0838 | -1.1 | 150.0395, 133.0110, 108.0248 | Guanosine                                            | C <sub>10</sub> H <sub>13</sub> N <sub>5</sub> O <sub>5</sub> | 283.2407* | Purine nucleosides      |
| 23 | 4.82 | 215.0826 | 215.0821 | 2.3  | 171.0897, 142.0648, 116.0488 | 1,2,3,4-Tetrahydro-beta-carboline-3-carboxylic acid  | C <sub>12</sub> H <sub>12</sub> N <sub>2</sub> O <sub>2</sub> | 216.2359* | Indoles and derivatives |
| 24 | 4.83 | 259.0714 | 259.0719 | -1.9 | 215.0826, 171.0897, 142.0648 | 1,2,3,4-Tetrahydro-b-carboline-1,3-dicarboxylic acid | C <sub>13</sub> H <sub>12</sub> N <sub>2</sub> O <sub>4</sub> | 260.2454* | Harmala alkaloids       |

\*Compared by database entries.

**Table S4** LC-MS characteristics of phenolic metabolites putatively identified in *Lactuca sativa*

| No. | RT (min) | Observed m/z ([M-H] <sup>-</sup> ) | Calculated m/z ([M-H] <sup>-</sup> ) | Error (ppm) | Major Fragments m/z ([M-H] <sup>-</sup> )        | Putative compound                           | Empirical formula | Empirical weight | Class                |
|-----|----------|------------------------------------|--------------------------------------|-------------|--------------------------------------------------|---------------------------------------------|-------------------|------------------|----------------------|
| 1   | 3.74     | 137.0234                           | 137.0239                             | -3.6        | 120.9012, 92.9595                                | Hydroxybenzoic acid                         | C7H6O3            | 138.1207*        | Hydroxybenzoic acid  |
| 2   | 2.77     | 153.0178                           | 153.0188                             | -6.5        | 153.0178, 109.0164                               | Dihydroxybenzoic acid                       | C7H6O4            | 154.1201*        | Hydroxybenzoic acid  |
| 3   | 2.84     | 301.0923                           | 301.0923                             |             | 139.0266                                         | 3-Methoxy-4-hydroxyphenyl-1-O-β-D-glucoside | C13H18O8          | 302.0929         | Hydroxybenzoic acid  |
| 4   | 2.96     | 197.0452                           | 197.0450                             | 1.0         | 182.0278, 153.0507, 138.0388                     | Syringic acid                               | C9H10O5           | 198.1727*        | Hydroxybenzoic acid  |
| 5   | 5.82     | 167.0336                           | 167.0344                             | -4.8        | 151.9360, 107.9908                               | Vanillic Acid                               | C8H8O4            | 168.1467*        | Hydroxybenzoic acid  |
| 6   | 1.96     | 329.0851                           | 329.0873                             | -6.7        | 167.0389, 23.0443, 108.0248                      | Vanillic acid glucoside                     | C14H18O9          | 330.0878         | Hydroxybenzoic acid  |
| 7   | 4.21     | 359.0973                           | 359.0978                             | -1.4        | 197.0452, 182.0222, 153.0583, 138.0292, 123.0103 | Syringic acid hexose                        | C15H20O10         | 360.0984         | Hydroxybenzoic acid  |
| 8   | 3.15     | 315.0712                           | 315.0716                             | -1.3        | 153.0092, 108.0248                               | Dihydroxybenzoic acid hexose                | C13H16O9          | 316.0722         | Hydroxybenzoic acid  |
| 9   | 7.28     | 435.0916                           | 435.0927                             | -2.5        | 315.0821, 297.0704, 153.0204, 152.0168, 137.0186 | Hydroxybenzoyl dihydroxybenzoyl-hexose      | C20H20O11         | 436.0933         | Hydroxybenzoic acid  |
| 10  | 4.87     | 179.0354                           | 179.0344                             | 5.6         | 135.0442                                         | Caffeic acid                                | C9H8O4            | 180.1574*        | Hydroxycinnamic acid |
| 11  | 3.4      | 343.1004                           | 343.1029                             | -7.3        | 181.0459, 163.0392, 135.0418                     | Dihydrocaffeic acid hexose                  | C15H20O9          | 344.1035         | Hydroxybenzoic acid  |



|    |      |          |          |       |                                        |                           |           |           |                      |
|----|------|----------|----------|-------|----------------------------------------|---------------------------|-----------|-----------|----------------------|
| 12 | 4.56 | 341.0863 | 341.0859 | 1.2   | n.d                                    | Caffeoyl-hexose           | C15H18O9  | 342.0878  | Hydroxycinnamic acid |
| 13 | 7.45 | 193.0487 | 193.0501 | -7.3  | 178.0262, 149.0583, 134.0328           | Ferulic acid              | C10H10O4  | 194.184*  | Hydroxycinnamic acid |
| 14 | 8.73 | 207.0624 | 207.0657 | -15.9 | 192.0149, 177.0171                     | Ferulic acid methyl ester | C11H12O4  | 208.0663  | Hydroxycinnamic acid |
| 15 | 5.97 | 355.1015 | 355.1029 | -3.9  | 193.0686, 149.0633                     | Ferulic acid glucoside    | C16H20O9  | 356.1035  | Hydroxycinnamic acid |
| 16 | 5.24 | 385.1144 | 385.1135 | 2.3   | 223.0594, 208.0355, 179.0354, 164.0444 | Sinapoyl glucoside        | C17H22O10 | 386.1140  | Hydroxycinnamic acid |
| 17 | 4.99 | 325.0924 | 325.0943 | -5.8  | 163.0392, 119.0493                     | p-Coumaroyl glucoside     | C15H18O9  | 326.0929  | Hydroxycinnamic acid |
| 18 | 3.44 | 311.0366 | 311.0403 | -11.9 | 179.0327, 145.0058, 135.0418           | Caftaric acid             | C13H12O9  | 312.229*  | Hydroxycinnamic acid |
| 19 | 3.45 | 149.0058 | 149.0086 | -18.8 | 103.0041, 81.0032, 72.9943, 59.0966    | Tartaric acid             | C4H6O6    | 150.0868* | Carbohydrates        |
| 20 | 5.01 | 353.087  | 353.0873 | -0.8  | 191.0545, 179.0327, 135.0418           | Caffeoylquinic acid       | C16H18O9  | 354.3087* | Hydroxycinnamic acid |
| 21 | 5.71 | 295.0457 | 295.0454 | 1.0   | 163.0366, 119.0537                     | Coutaric acid             | C13H12O8  | 296.2296* | Hydroxycinnamic acid |
| 22 | 6.29 | 337.0908 | 337.0923 | -4.4  | 191.0545, 173.0444, 163.0392           | p-Coumaroylquinic acid    | C16H18O8  | 338.3093* | Alcohols and polyols |
| 23 | 5.5  | 515.1172 | 515.119  | -3.5  | 353.0870, 191.0545, 179.0327, 135.0442 | Dicafeoylquinic acid      | C25H24O12 | 516.4509* | Alcohols and polyols |

|    |      |          |          |      |                                                                  |                                               |                                                 |           |                             |
|----|------|----------|----------|------|------------------------------------------------------------------|-----------------------------------------------|-------------------------------------------------|-----------|-----------------------------|
| 24 | 6.71 | 457.0783 | 457.0771 | 2.6  | 311.0402, 295.0422,<br>277.0388, 179.0327,<br>163.0366, 149.0208 | Caffeoyltartaric-p-<br>coumaroyl acid         | C <sub>22</sub> H <sub>18</sub> O <sub>11</sub> | 458.0776  | Hydroxycinnamic<br>acid     |
| 25 | 7.83 | 499.1224 | 499.124  | -3.2 | 353.0870, 191.0545                                               | p-Coumaroyl-<br>caffeoylquinic acid           | C <sub>25</sub> H <sub>24</sub> O <sub>11</sub> | 500.1246  | Hydroxycinnamic<br>acid     |
| 26 | 4.56 | 313.0905 | 313.0923 | -5.7 | 151.0391, 107.0391                                               | 4-hydroxyphenylacetyl<br>glucoside            | C <sub>14</sub> H <sub>18</sub> O <sub>8</sub>  | 314.0929  | Hydroxyphenylacetic<br>acid |
| 27 | 0.53 | 447.1289 | 447.1291 | -0.4 | 193.0317, 175.0238,<br>151.0466                                  | Di(4-<br>hydroxyphenylacetyl)-<br>hexose      | C <sub>22</sub> H <sub>24</sub> O <sub>10</sub> | 448.1297  | Hydroxyphenylacetic<br>acid |
| 28 | 8.86 | 301.0319 | 301.0348 | -9.6 | 178.9752, 151.0039                                               | Quercetin                                     | C <sub>15</sub> H <sub>10</sub> O <sub>7</sub>  | 302.2357* | Flavonoids                  |
| 29 | 6.55 | 463.0846 | 463.0877 | -6.7 | 301.0319, 300.0241                                               | Quercetin hexose                              | C <sub>21</sub> H <sub>20</sub> O <sub>12</sub> | 464.0882  | Flavonoids                  |
| 30 | 7.27 | 477.064  | 477.0669 | -6.1 | 301.0319                                                         | Quercetin 3-glucuronide                       | C <sub>21</sub> H <sub>18</sub> O <sub>13</sub> | 478.0675  | Flavonoids                  |
| 31 | 7.63 | 549.086  | 549.088  | -3.6 | 505.0989, 463.0846,<br>301.0319                                  | Quercetin<br>malonylglucoside                 | C <sub>24</sub> H <sub>22</sub> O <sub>15</sub> | 550.0886  | Flavonoids                  |
| 32 | 5.84 | 531.1142 | 531.1139 | 0.6  | 463.1022, 301.0426,<br>300.0348                                  | Quercetin-3-O-(6"-O-<br>crotonyl)-β-glucoside | C <sub>25</sub> H <sub>23</sub> O <sub>13</sub> | 531.1144  | Flavonoids                  |
| 33 | 7.05 | 579.1681 | 579.1714 | -5.7 | 271.0613                                                         | Naringenin 7-<br>neohesperidoside             | C <sub>27</sub> H <sub>32</sub> O <sub>14</sub> | 580.1792* | Flavonoids                  |
| 34 | 7.81 | 445.0753 | 445.0771 | -4.0 | 269.0464                                                         | Apigenin 7-O-<br>glucuronide                  | C <sub>21</sub> H <sub>18</sub> O <sub>11</sub> | 446.0849* | Flavonoids                  |
| 35 | 7.66 | 665.2063 | 665.2082 | -2.9 | 417.1554                                                         | Syringaresinol<br>malonylhexose               | C <sub>31</sub> H <sub>38</sub> O <sub>16</sub> | 665.2087  | Lignan                      |
| 36 | 5.77 | 579.2075 | 579.2078 | -0.5 | 417.1847, 399.1428,<br>384.1068                                  | Syringaresinol-β-D-<br>glucoside              | C <sub>28</sub> H <sub>36</sub> O <sub>13</sub> | 580.2083  | Lignan                      |

|    |      |          |          |      |                                 |                                                                        |           |           |               |
|----|------|----------|----------|------|---------------------------------|------------------------------------------------------------------------|-----------|-----------|---------------|
| 37 | 9.77 | 581.2192 | 581.2234 | -7.2 | 359.1671, 341.1921,<br>329.1407 | Alangilignoside C                                                      | C28H38O13 | 582.2240  | Lignan        |
| 38 | 7.35 | 341.1241 | 341.1236 | 1.5  | 179.0683                        | Coniferoside                                                           | C16H22O8  | 342.3411* | Monolignol    |
| 39 | 2.54 | 405.1152 | 405.1186 | -8.4 | 243.0703                        | 2,3,5,4 $\beta$ -<br>Tetrahydroxystilbene2-<br>O- $\beta$ -D-glucoside | C20H22O9  | 406.1191  | Stilbene      |
| 40 | 6.83 | 411.1278 | 411.1291 | -3.2 | 163.0758, 148.0404              | Eugenol<br>malonylglucoside                                            | C19H24O10 | 412.1297  | Phenylpropene |

\*Compared by database entries.

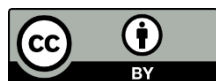

© 2019 by the authors. Submitted for possible open access publication under the terms and conditions of the Creative Commons Attribution (CC BY) license (<http://creativecommons.org/licenses/by/4.0/>).
